# Supplementary material
Source: PubMed Central journal article supplement (PMC5255948)
Supplement: ejhg2016148x1.pdf [file ejhg2016148x1.pdf]

| <i>Primer name</i>                       | <i>Sequence 5'- 3'</i>                 | <i>PCR conditions</i>                            |
|------------------------------------------|----------------------------------------|--------------------------------------------------|
| P1- Rv                                   | Fam-AGCCTGGCCGAAAGAAAGAAAT             | Annealing temperature 60°C (30 cycles) + 5% DMSO |
| P2- Fw <sup>11</sup>                     | Fam-GAACGGGGCTCGAAGGGTCCTTGAGCCG       | Annealing temperature 60°C (30 cycles) + 5% DMSO |
| P3R <sup>11</sup>                        | TACGCATCCCAGTTTGAGACG                  | Annealing temperature 60°C (30 cycles) + 5% DMSO |
| P4-CTG-Fw <sup>11</sup>                  | TACGCATCCCAGTTTGAGACGTGCTGCTGCTGCTGCT  | Annealing temperature 60°C (30 cycles) + 5% DMSO |
| P4-CAG-Rv <sup>11</sup>                  | TACGCATCCCAGTTTGAGACGCAGCAGCAGCAGCA    | Annealing temperature 60°C (30 cycles) + 5% DMSO |
| P4hex1 <sup>4</sup>                      | TACGCATCCCAGTTTGAGACGTGCCGCTGCCGCTGCC  | Annealing temperature 60°C (30 cycles) + 5% DMSO |
| P4-CTC <sup>4</sup>                      | TACGCATCCCAGTTTGAGACGTGCTGCTGCTGCTGCTC | Annealing temperature 60°C (30 cycles) + 5% DMSO |
| P4-CC <sup>4</sup>                       | TACGCATCCCAGTTTGAGACGTGCTGCTGCTGCTGCC  | Annealing temperature 60°C (30 cycles) + 5% DMSO |
| <i>DMPKEx15-Fw (LR-PCR)</i>              | TTTCCTGCTCCTGTTCG                      | Annealing temperature 56°C (40 cycles) + 5% DMSO |
| <i>DMK1111-Rv (LR-PCR)</i> <sup>10</sup> | TGTCGGGGTCTCAGTGCATCCA                 | Annealing temperature 56°C (40 cycles) + 5% DMSO |

***Table S1***

List of primer sequences and PCR conditions utilized in this study.
